# Supplementary material
Source: publisher site journal article supplement (http://static.cambridge.org/content/id/urn:cambridge.org:id:article:S0032247418000591/resource/name/S0032247418000591supp001.docx)
Supplement: Supplementary file 1 [file S0032247418000591supp001.docx]

**Supplementary Information**

**Survey: Impact of APECS Education and Outreach activities**

**Section 1: General Background**

1. Gender

- Female
- Male
- Prefer not to say

2. At what stage of your career did you become an APECS member?

- Undergraduate Student
- Masters Student
- PhD Student
- Postdoc
- Research Assistant
- Research Scientist
- Faculty Position
- Working in management/public relations/economic sector
- Looking for / in-between jobs
- Volunteer / Intern
- I don’t remember
- Other

3. What is your current career stage?

- Undergraduate Student
- Masters Student
- PhD Student
- Postdoc
- Research Assistant
- Research Scientist
- Faculty Position
- Working in management/public relations/economic sector
- Looking for / in-between jobs
- Volunteer / Intern
- I don’t remember
- Other

4. Are you, or have you ever been, actively involved in APECS (e.g serving on a committee, planning/organising an APECS event, etc.)?

- Yes (Go to section 2)
- No (Go to section 3)

**Section 2: APECS involvement**

5. In what capacity were you involved in APECS? (Please select as many as apply.)

- Member
- Member on an organising committee for an APECS event (online or in-person)
- Representative to a partner organisation
- National Committee Board member
- Council
- Executive Committee
- International Directorate
- Advisory Committee Member
- APECS Norge Board Member
- Other

6. How many years have you been actively involved in APECS?

- 1
- 2
- 3
- 4
- 5+

**Section 3: Education and Outreach Activities**

7. How many times have you PARTICIPATED in education and outreach activities?

|  | 0 | 1-5 | 6-10 | 11-15 | 15+ |
| --- | --- | --- | --- | --- | --- |
| Non-APECS activity before joining APECS |  |  |  |  |  |
| Non-APECS activity after joining APECS |  |  |  |  |  |
| APECS activity (incl. National Committee activities) |  |  |  |  |  |

8. How many times have you ORGANISE education and outreach activities?

|  | 0 | 1-5 | 6-10 | 11-15 | 15+ |
| --- | --- | --- | --- | --- | --- |
| Non-APECS activity before joining APECS |  |  |  |  |  |
| Non-APECS activity after joining APECS |  |  |  |  |  |
| APECS activity (incl. National Committee activities) |  |  |  |  |  |

9. What types of activities did you PARTICIPATE in?

- Classroom visit
- Helping out at a science festival/university open day
- Writing for general public e.g. blog post, newspaper article
- Careers event e.g. promoting Science, Technology, Engineering and Mathematics careers
- Helping out at, or organising a workshop
- Online event e.g. webinar
- I have not participated in any activities

10. What types of activities did you ORGANISE?

- Classroom visit
- Helping out at a science festival/university open day
- Writing for general public e.g. blog post, newspaper article
- Careers event e.g. promoting Science, Technology, Engineering and Mathematics careers
- Helping out at, or organising a workshop
- Online event e.g. webinar
- I have not organised any activities

**Section 4: Education and Outreach Activities organised by APECS**

11. Since becoming an APECS member, have you been involved in:

|  | Participated | Helped to organise |
| --- | --- | --- |
| APECS Polar Weeks |  |  |
| Antarctica Day |  |  |
| APECS webinars on science communication, education and outreach |  |  |
| APECS Social media event (e.g. Reddit Ask Me Anything) |  |  |
| APECS workshop |  |  |
| Education and outreach activity organised by APECS or one of its National Committees not including Antarctica Day / Polar Weeks? |  |  |
| Virtual Poster Session |  |  |
| Frostbytes |  |  |
| Other |  |  |

12. What skills/experience have you gained by PARTICIPATING in APECS events?

- Networking
- Communication
- Interdisciplinary Knowledge
- Leadership
- Team Management
- Time Management
- Logistics / Organisation
- Web-based technologies (e.g. webpages, online conferencing, etc.)

13. What have you gained by (CO-)ORGANISING APECS events?

- Networking
- Communication
- Interdisciplinary Knowledge
- Leadership
- Team Management
- Time Management
- Logistics / Organisation
- Web-based technologies (e.g. webpages, online conferencing, etc.)

14. Which of the following statements apply best?

- I was involved in non-APECS education and outreach activities first and then subsequently got involved in APECS activities.
- I was involved in APECS education and outreach activities first and then subsequently got involved in non-APECS activities.
- None of the above.

15. Fill in the blank: Since becoming involved in APECS I have … the number of education and outreach activities I am involved in.

- Decreased
- Increased
- Not changed

16. Which of the following statements apply: For my career, involvement in APECS education and outreach activities...

- Has not helped me / no impact
- Has provided useful contacts/networking to secure a job
- Has provided ideas for / led to alternative (non-academic) career pathways
- Has enabled me to develop skills essential to my future career goals
- Has helped me in other ways

17. Please add any additional comments on the impact of involvement in APECS’ education and outreach activities on your career.

18. Would you be happy to be interviewed as a follow up to your responses in this survey? If yes, please provide your name and email address
